# Supplementary material for: Sweroside Prevents Non-Alcoholic Steatohepatitis by Suppressing Activation of the NLRP3 Inflammasome
Source: PubMed Central journal article supplement (PMC7216241; doi:10.3390/ijms21082790), 2020-04-17
Supplement: ijms-21-02790-s001.pdf [file ijms-21-02790-s001.pdf]

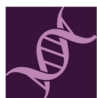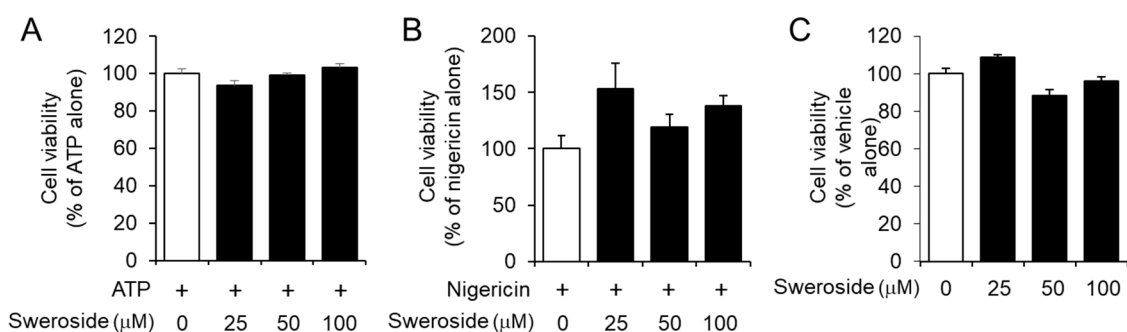

**Figure S1.** The effects of sweroside on cell viability. (A–C) Bone marrow-derived macrophages were treated with sweroside for 1 hour and further treated with (A) ATP (5 mM) for 2 hours or (B) nigericin (10 μM) for 16 hours. For C, sweroside was treated for 17 hours. Cell viability was determined by the MTT assay. Values indicate means ± SEM ( $n = 3$ ).

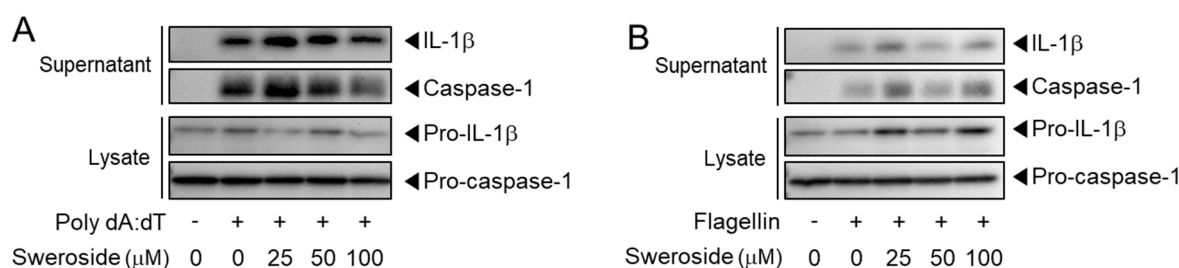

**Figure S2.** Effects of sweroside on the activation of AIM2 and NLRC4 inflammasomes in primary macrophages. (A,B) Bone marrow-derived macrophages were primed with LPS (500 ng/ml) for 4 hours. The cells were treated with sweroside for 1 hour and then stimulated with (A) poly dA:dT (1 μg/ml) or (B) flagellin (10 μg/ml) for 6 hours. The cell culture supernatants and cell lysates were analyzed for IL-1β, pro-IL-1β, cleaved caspase-1, and pro-caspase-1 by immunoblot assay.
